# Supplementary material for: E-Cadherin Expression Is Regulated by miR-192/215 by a Mechanism That Is Independent of the Profibrotic Effects of Transforming Growth Factor-β
Source: PubMed Central journal article supplement — Diabetes. 2010 Apr 14;59(7):1794–802. doi: 10.2337/db09-1736 (PMC2889781; doi:10.2337/db09-1736), 2010-04-14

**Supplementary Figure 1:** Relative expression levels of miR-192 and miR-215 in proximal tubular cells (NRK52E), mouse primary mesangial cells (MCs) and conditionally immortalised human podocytes. The level of miR-192 shown in each case is relative to miR-215 which has been arbitrarily assigned a value of 1.

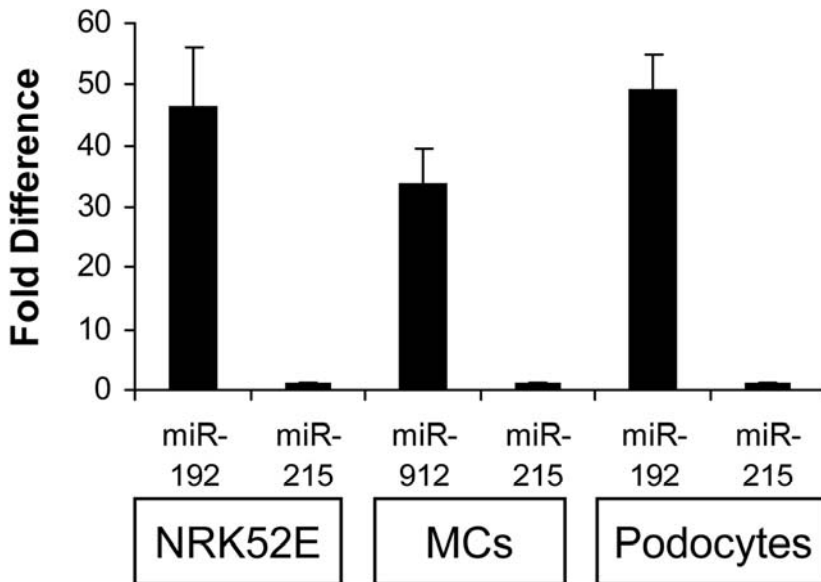

**Supplementary Figure 2:** Relative expression levels for PCNA in control and TGF $\beta$  treated NRK52E cells. The level of PCNA is significantly reduced with TGF $\beta$  treatment. (\* $p < 0.05$  compared to control).

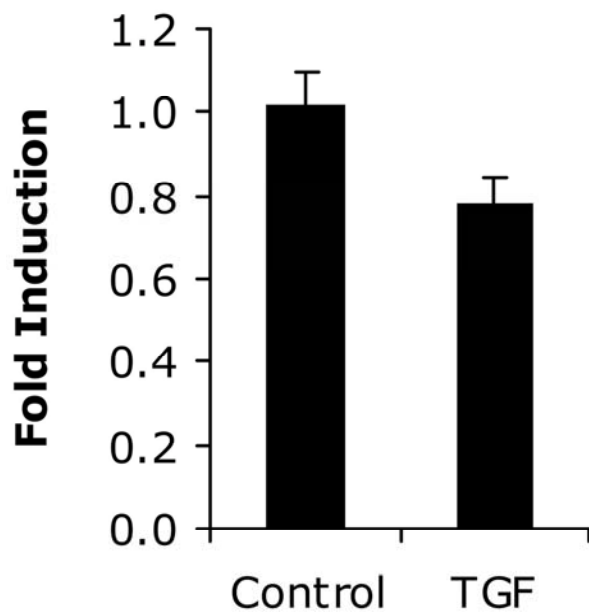

Supplement: supp_db09-1736_onlineappendix.pdf [file supp_db09-1736_onlineappendix.pdf]
